## Gene expression

# DEsingle for detecting three types of differential expression in single-cell RNA-seq data

Zhun Miao<sup>1</sup>, Ke Deng<sup>2</sup>, Xiaowo Wang<sup>1</sup> and Xuegong Zhang<sup>1,3,\*</sup>

<sup>1</sup>MOE Key Laboratory of Bioinformatics, Division of Bioinformatics and Center for Synthetic and Systems Biology, TNLIST, Department of Automation, <sup>2</sup>Center for Statistical Science, Department of Industrial Engineering and <sup>3</sup>School of Life Sciences, Tsinghua University, Beijing 100084, China

\*To whom correspondence should be addressed.

Associate Editor: Bonnie Berger

Received and revised on March 5, 2018; editorial decision on April 19, 2018; accepted on April 20, 2018

## Abstract

**Summary:** The excessive amount of zeros in single-cell RNA-seq (scRNA-seq) data includes ‘real’ zeros due to the on-off nature of gene transcription in single cells and ‘dropout’ zeros due to technical reasons. Existing differential expression (DE) analysis methods cannot distinguish these two types of zeros. We developed an R package DEsingle which employed Zero-Inflated Negative Binomial model to estimate the proportion of real and dropout zeros and to define and detect three types of DE genes in scRNA-seq data with higher accuracy.

**Availability and implementation:** The R package DEsingle is freely available at Bioconductor (<https://bioconductor.org/packages/DEsingle>).

**Contact:** zhangxg@tsinghua.edu.cn

**Supplementary information:** [Supplementary data](#) are available at *Bioinformatics* online.

## 1 Introduction

Single-cell RNA-seq (scRNA-seq) data have different characteristics from bulk RNA-seq data (Brennecke *et al.*, 2013). One important difference is that there are much more zero values in scRNA-seq data (Bacher and Kendziorski, 2016; Miao and Zhang, 2016). There are both biological and technical reasons. On the technical aspect, usually the amount of mRNAs in one cell is very tiny (~0.01–2.5 pg; Boon *et al.*, 2011), and most genes have only small mRNA copy numbers in a cell (Macaulay and Voet, 2014; Marinov *et al.*, 2014). Due to the low efficiency of the mRNA capture protocol (Islam *et al.*, 2014; Marinov *et al.*, 2014), the mRNAs of some genes are totally missed during the reverse transcription and cDNA amplification steps and consequently missed in the sequencing (Wang and Navin, 2015). This phenomenon is called ‘dropout’ events (Kharchenko *et al.*, 2014). We call this type of zero values in the data as dropout zeros as they do not reflect the true expression status. On the other hand, because of the stochastic nature of transcription in single cells and the heterogeneity between cells, there is also a high chance that the expression levels of some genes are really zero in some cells at the time when they

are sequenced (Delmans and Hemberg, 2016). We call this type of zero values as ‘real’ zeros because they reflect the true status of the genes’ transcription. The excessive zero values observed in scRNA-seq data are the mixture of these two possible types of zeros. Discriminating these two types of zeros is important for downstream analyses. Existing methods for analysing differential gene expression in single cells did not take the different types of zeros into consideration.

We developed an R package DEsingle to define and detect three types of differential expression (DE) genes between two groups of scRNA-seq data. It employed Zero-Inflated Negative Binomial (ZINB) model to estimate the proportion of real and dropout zeros. Simulation experiments showed that DEsingle can detect DE genes with better overall performance than existing methods. We applied DEsingle on a scRNA-seq dataset of human pre-implantation embryonic cells (Petropoulos *et al.*, 2016) and found that the three types of DE genes imply different biological functions. DEsingle is not only a new tool for detecting DE genes with high accuracy, but also provides a new view of DE genes by discriminating three types of differential expression.

## 2 Materials and methods

### 2.1 The ZINB model for discriminating the proportion of real and dropout zeros

DEsingle adopted the ZINB model to describe the read counts and the excessive zeros in scRNA-seq data (Supplementary Fig. S1). The ZINB distribution is a mixture of constant zeros and a Negative Binomial (NB) distribution with a mixing parameter  $\theta$  (Garay et al., 2011). The probability mass function (PMF) of ZINB distribution for read counts  $N_g$  of gene  $g$  in a group of cells is

$$P(N_g = n | \theta, r, p) = \theta \cdot I(n = 0) + (1 - \theta) \cdot f_{\text{NB}}(r, p) \\ = \theta \cdot I(n = 0) + (1 - \theta) \cdot \binom{n+r-1}{n} p^n (1-p)^r, \quad n = 0, 1, 2, \dots$$

where  $\theta$  is the proportion of constant zeros of gene  $g$  in the group of cells,  $I(n = 0)$  is an indicator function which equals to 1 for  $n = 0$  and 0 for  $n \neq 0$ ,  $f_{\text{NB}}$  is the PMF of the NB distribution,  $r$  is the size parameter and  $p$  is the probability parameter of the NB distribution. The NB part can also have zero values. The observed zero values are the mixture of constant zeros and zeros from the NB distribution. We proved that this model can separate observed zeros as two parts to reflect the proportion of real and dropout zeros (Supplementary Material). Based on this, we can distinguish three types of DE according to whether the difference is in the zero part or the NB part of the distribution, or in both.

### 2.2 The workflow of DEsingle

DEsingle uses the ZINB model to detect differentially expressed genes. It includes three major steps: data normalization, detection of DE genes and sub-division of DE genes into three types (Supplementary Fig. S1E). The input of DEsingle is the raw read-count matrix from scRNA-seq data. DEsingle integrates a modified median normalization method similar to the one used in DESeq (Anders and Huber, 2010). After normalization, maximum likelihood estimation (MLE) and constrained MLE of the parameters of two ZINB populations are calculated. Finally, DEsingle uses likelihood-ratio tests to compare two ZINB populations to detect DE genes and to sub-divide them into the three types: DEs, DEa and DEg. DEs refers to ‘different expression status’. It is the type of genes that show significant difference in the proportion of real zeros in the two groups, but do not have significant difference in the other cells. DEa is for ‘DE abundance’, which refers to genes that are significantly differentially expressed between the groups without significant difference in the proportion of real zeros. DEg or ‘general differential expression’ refers to genes that have significant difference in both the proportions of real zeros and the expression abundances between the two groups. The detailed definition of the three types and description of the package are given in the Supplementary Material.

## 3 Results and discussion

### 3.1 Performance evaluation on simulated data

We compared DEsingle with six existing methods on eight simulated datasets that considers both stochasticity and mRNA capture efficiency (Supplementary Material). Supplementary Figure S2 shows the ROC curves and the AUCs of the different methods. DEsingle performed the best on seven of the datasets and was very close to the best on the other dataset.

### 3.2 Three types of DE genes found in real data experiments

We applied DEsingle on a human pre-implantation embryonic cell scRNA-seq dataset (Petropoulos et al., 2016). Results show that DEsingle can detect genes and pathways that have significant changes in their expression between days of embryonic cell development, and the three types of detected DE genes are enriched in different biological processes (Supplementary Figs S3 and S4). Distinguishing DE genes as three sub-types provides the extra possibility of analysing the expression patterns and functions in different cell groups. Details of the results and functional analyses are given in the Supplementary Material.

## 4 Conclusion

We developed an R package DEsingle for DE analysis of scRNA-seq data. By estimating the proportion of real and dropout zeros with ZINB model, DEsingle not only detects DE genes with high accuracy but also distinguishes three types of DE patterns which can reveal different functional mechanisms. We believe that DEsingle is a powerful tool that brings a new angle for the analysis of scRNA-seq data.

## Funding

This work was supported by the National Natural Science Foundation of China (grant numbers 61721003, 61773230 and 11771242) and the Chan Zuckerberg Initiative, an advised fund of Silicon Valley Community Foundation, as part of the Human Cell Atlas program.

*Conflict of Interest:* none declared.

## References

- Anders, S. and Huber, W. (2010) Differential expression analysis for sequence count data. *Genome Biol.*, **11**, R106.
- Bacher, R. and Kendziorski, C. (2016) Design and computational analysis of single-cell RNA-sequencing experiments. *Genome Biol.*, **17**, 63.
- Boon, W.C. et al. (2011) Increasing cDNA yields from single-cell quantities of mRNA in standard laboratory reverse transcriptase reactions using acoustic microstreaming. *J. Vis. Exp. Jove*, **53**, e3144.
- Brennecke, P. et al. (2013) Accounting for technical noise in single-cell RNA-seq experiments. *Nat. Methods*, **10**, 1093–1095.
- Delmans, M. and Hemberg, M. (2016) Discrete distributional differential expression (D3E)—a tool for gene expression analysis of single-cell RNA-seq data. *BMC Bioinformatics*, **17**, 110.
- Garay, A.M. et al. (2011) On estimation and influence diagnostics for zero-inflated negative binomial regression models. *Comput. Stat. Data Anal.*, **55**, 1304–1318.
- Islam, S. et al. (2014) Quantitative single-cell RNA-seq with unique molecular identifiers. *Nat. Methods*, **11**, 163–166.
- Kharchenko, P.V. et al. (2014) Bayesian approach to single-cell differential expression analysis. *Nat. Methods*, **11**, 740–742.
- Macaulay, I.C. and Voet, T. (2014) Single cell genomics: advances and future perspectives. *PLoS Genet.*, **10**, e1004126.
- Marinov, G.K. et al. (2014) From single-cell to cell-pool transcriptomes: stochasticity in gene expression and RNA splicing. *Genome Res.*, **24**, 496–510.
- Miao, Z. and Zhang, X. (2016) Differential expression analyses for single-cell RNA-Seq: old questions on new data. *Quan. Biol.*, **4**, 243–260.
- Petropoulos, S. et al. (2016) Single-cell RNA-seq reveals lineage and X chromosome dynamics in human preimplantation embryos. *Cell*, **165**, 1012–1026.
- Wang, Y. and Navin, N.E. (2015) Advances and applications of single-cell sequencing technologies. *Mol. Cell*, **58**, 598–609.
